# Supplementary material for: Myosin accumulation and striated muscle myopathy result from the loss of muscle RING finger 1 and 3
Source: JCI journal article supplement (doi:10.1172/jci32827), 2007-09-04
Supplement: sd1 [file 1]

301 Moved Permanently

# Moved Permanently

The document has moved here.
