# Supplementary material for: Myosin accumulation and striated muscle myopathy result from the loss of muscle RING finger 1 and 3
Source: JCI journal article supplement (doi:10.1172/jci32827), 2007-09-04
Supplement: sd1 [file 1]

| Protein Name                       | MW (kDa) | Sequence                       |
|------------------------------------|----------|--------------------------------|
| Desmin                             | 53.5     | APSYGAGELLDFSLADAVNQEFLATR     |
| Myh 4 (type IIb), skeletal muscle  | 222.7    | TLAFLFSGGQAAEAEGGGGK           |
| Myh 2 (type IIa), skeletal muscle  | 219.6    | TLAYLLFSGAQTAEEASSGGAAK        |
| Myh 1 (type IIx) skeletal muscle   | 223.2    | HADSVaelGEQIDNLQR              |
| Myh 2 (type IIa)                   | 183.0    | TLAYLFSGAQTAEEASSGGAAK         |
| Calsequestrin 1                    | 45.6     | KLGLTEEDSVYVFK                 |
| Myh 6 (type I)                     | 222.7    | LEEAGGATSVQIEMNK               |
| Actin, $\alpha$ 1, skeletal muscle | 42.0     | DLYANNVMSGGTTMYPGIADR          |
| Titin, isoform N2-B                | 2984.5   | VTGLTEGLEYEFER                 |
| Actin, $\alpha$ 1, skeletal muscle | 41.8     | TTGIVLDSGDGVTHNVPIYEGYALPHAIMR |

**Supplemental Table 1**

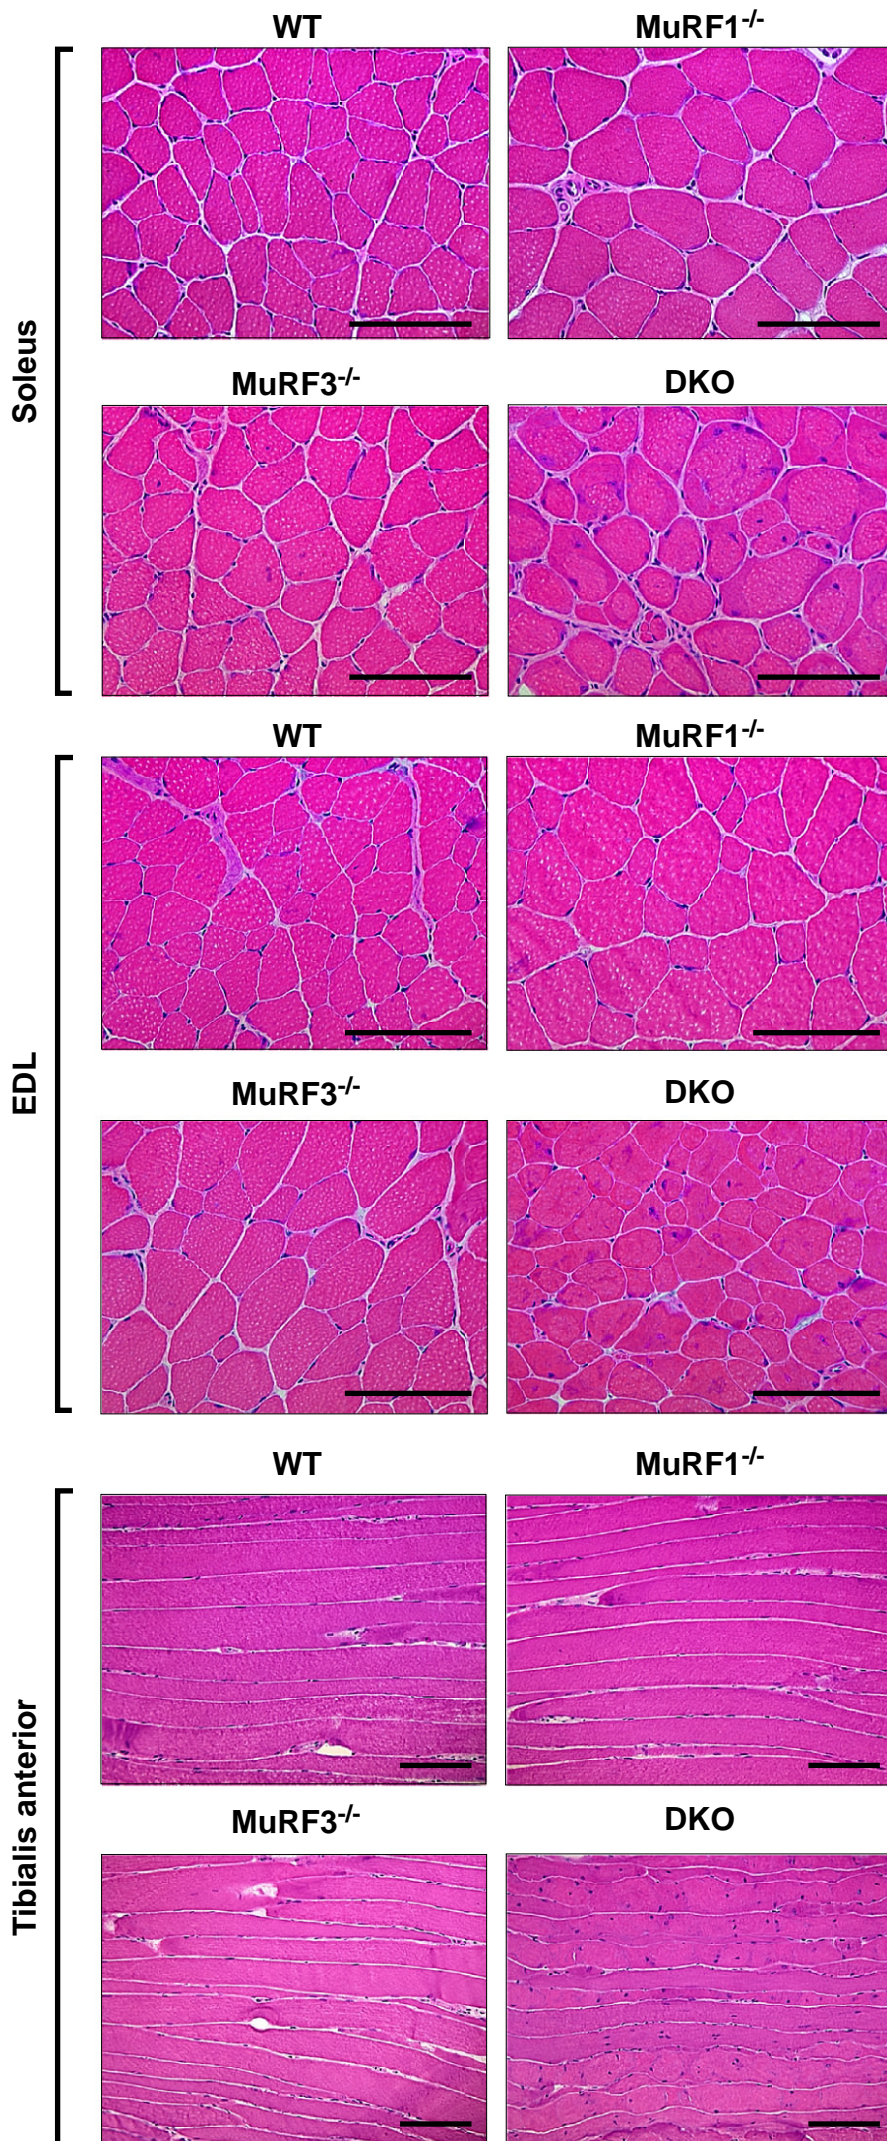

Supplemental Figure 1

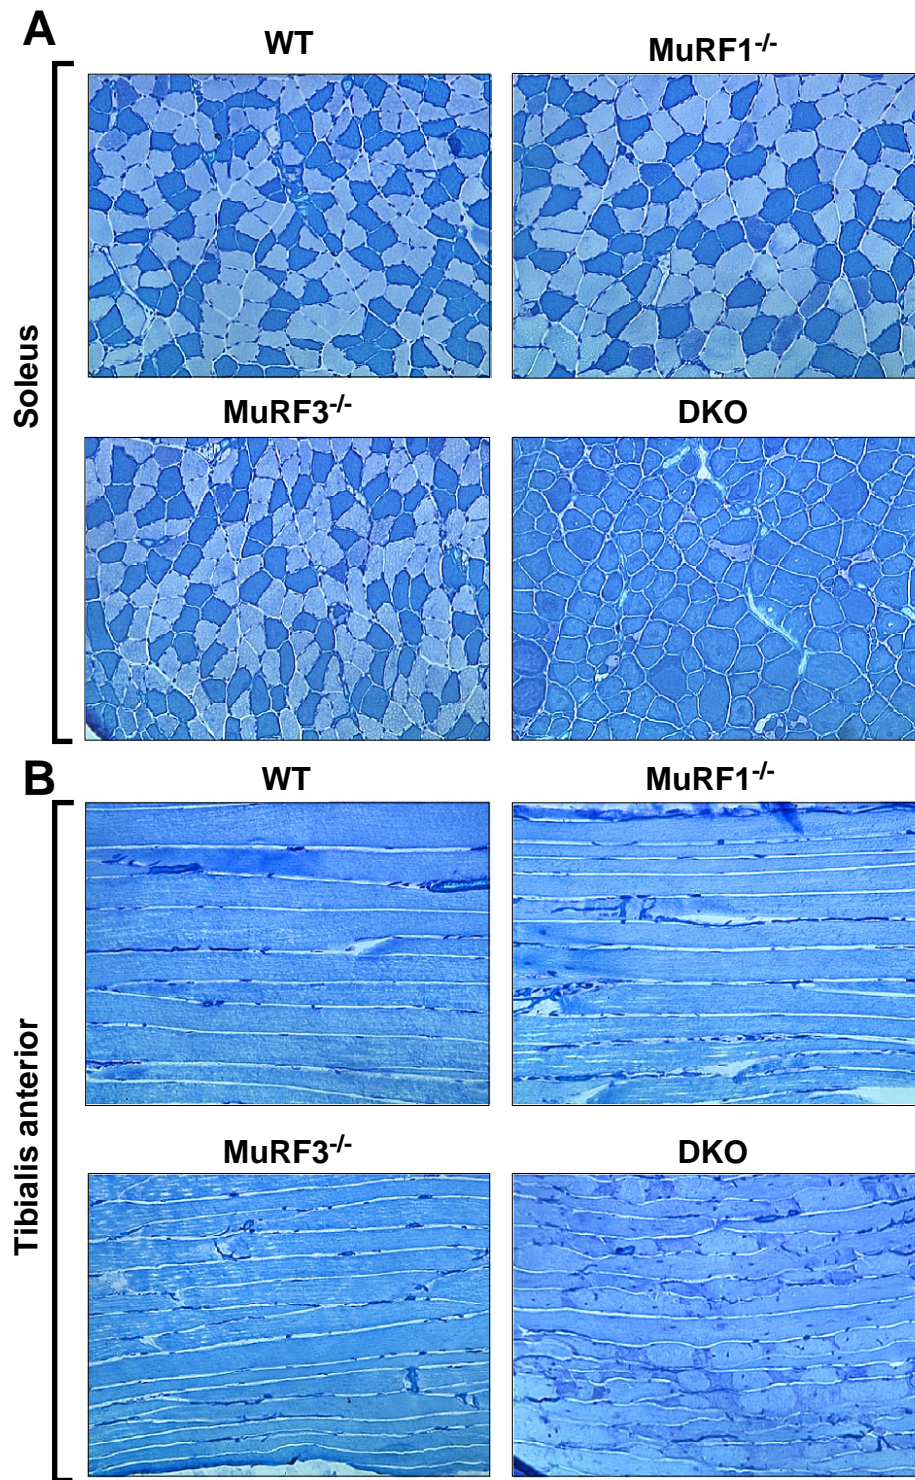

Supplemental Figure 2

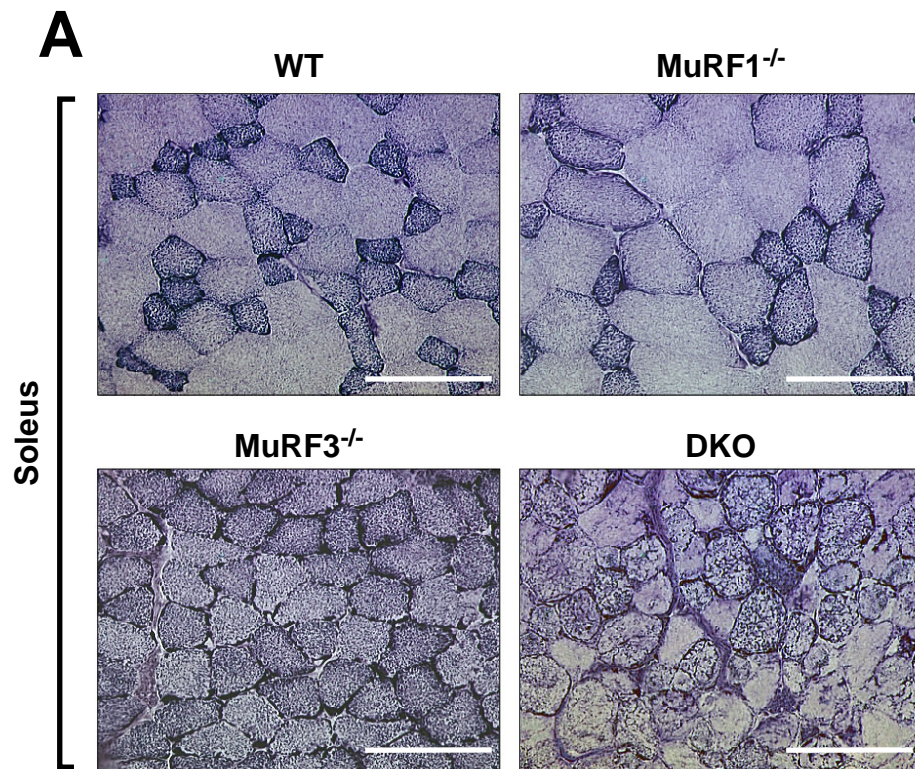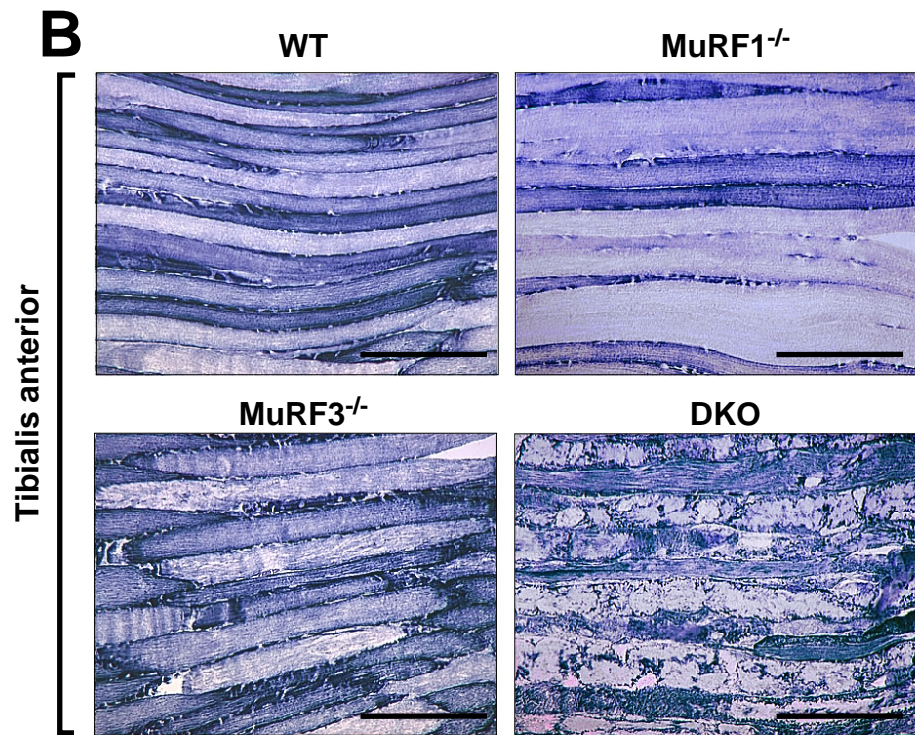

Supplemental Figure 3

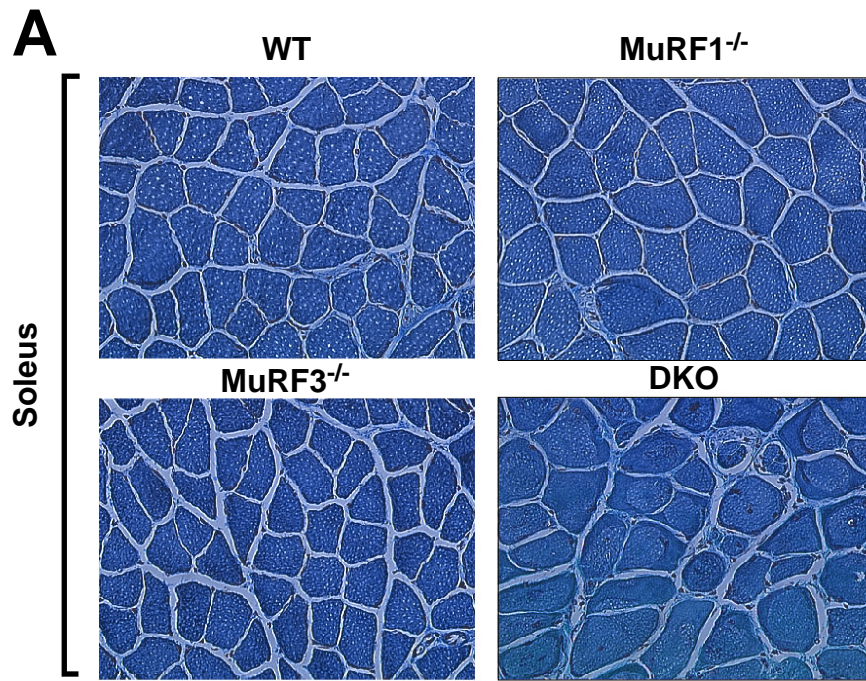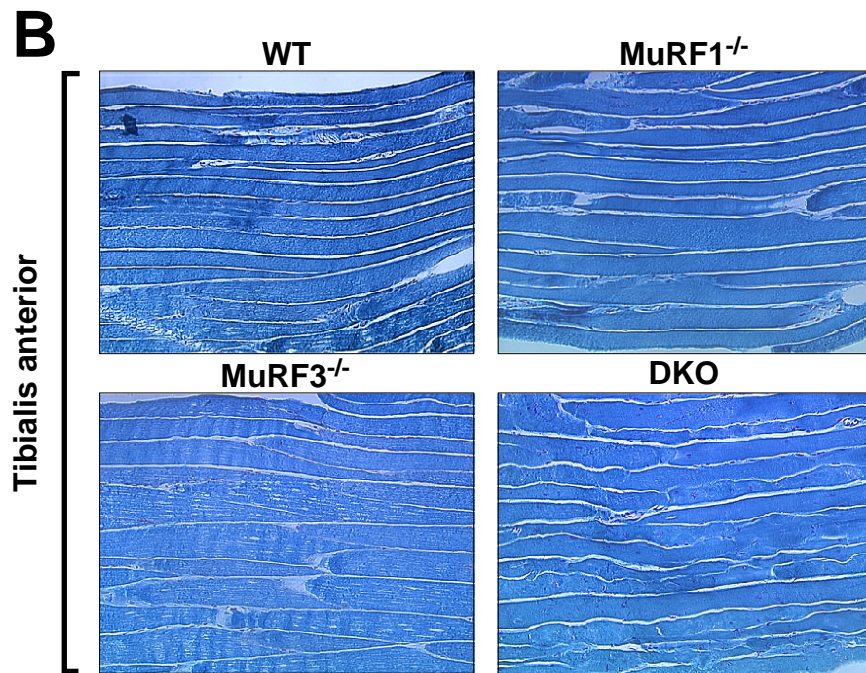

Supplemental Figure 4

**A**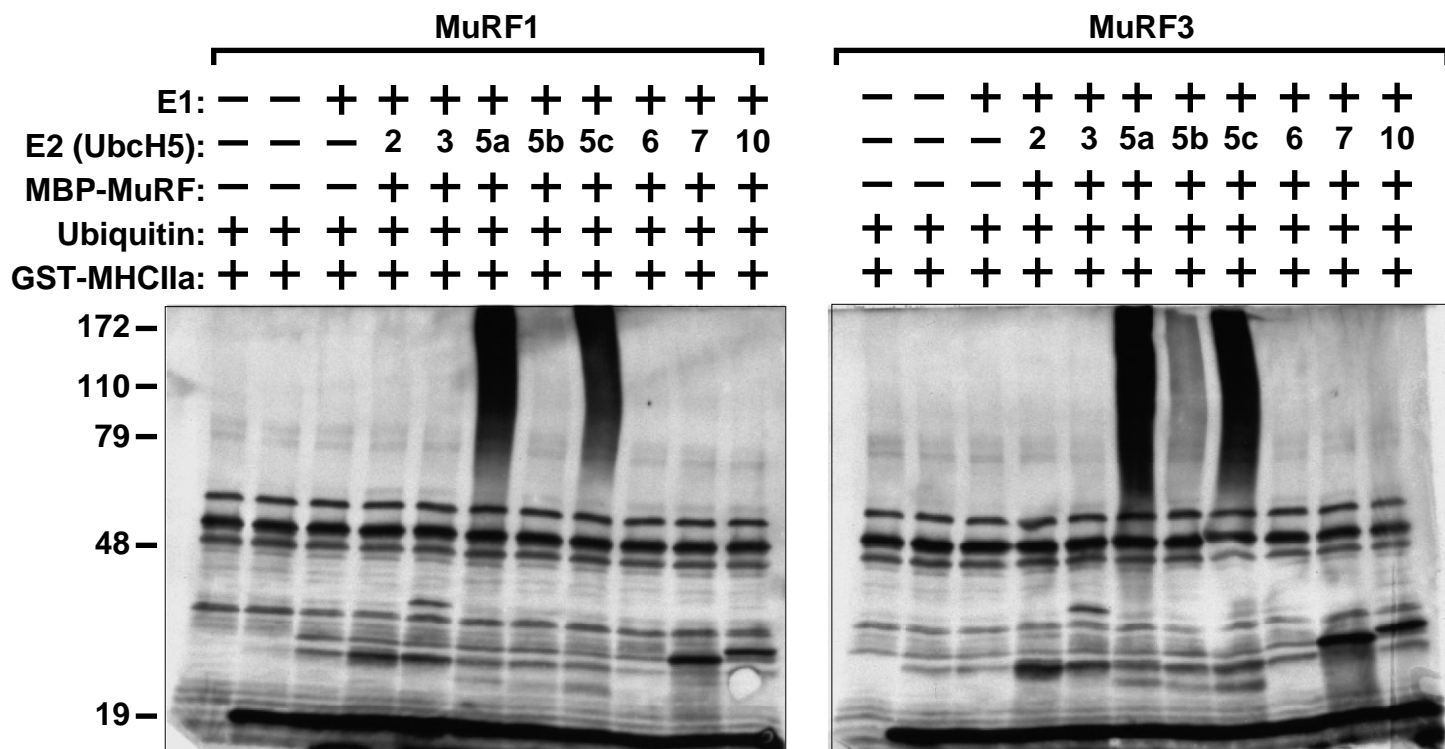**B**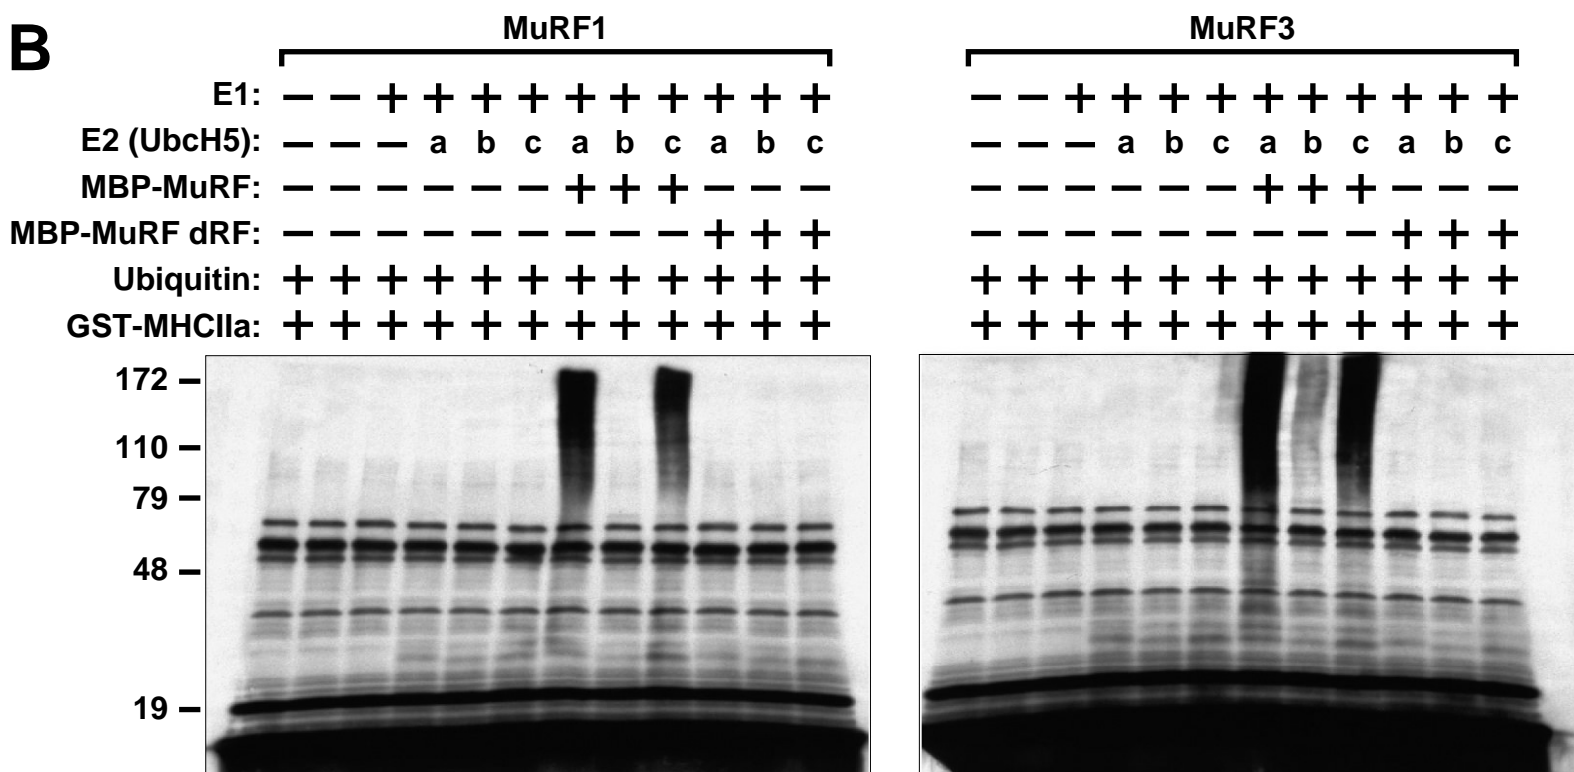

Supplemental Figure 5

## **Supplemental Online information**

### **Supplemental Table 1**

Mass spectroscopy of the 60kDa protein band isolated from soleus of DKO mice by SDS-PAGE shows accumulation of myosin fragments within the soleus of MuRF1 and 3 double mutant mice.

### **Supplemental Figure 1**

H&E staining of histological sections of soleus (A, cross section), extensor digitorum longus (EDL) (cross section) and tibialis anterior (longitudinal section) from wild-type (WT), MuRF1<sup>-/-</sup>, MuRF3<sup>-/-</sup> and DKO mice. Subsarcolemmal eosinophilic material accumulates along the entire length of the myofiber around a central myofiber core of DKO muscle. Abnormal heterogeneity of fiber size, centrally localized nuclei, atrophic myofibers, split fibers and more nuclei were found in DKO muscle. Bar=100 μm.

### **Supplemental Figure 2**

Detection of myosin ATPase activity using a metachromatic dye ATPase assay in soleus (A, cross sections) and tibialis anterior (B, longitudinal sections) muscles from wild-type (WT), MuRF1<sup>-/-</sup>, MuRF3<sup>-/-</sup> and DKO mice. Beta/slow MHC myofibers stain dark blue and MHC II myofibers stain light blue. Bar=100 μm.

### **Supplemental Figure 3**

NADH stain of soleus (A, cross sections) and tibialis anterior (B, transverse sections) muscles of wild-type (WT), MuRF1<sup>-/-</sup>, MuRF3<sup>-/-</sup> and DKO mice where dark and punctuate blue staining indicating mitochondria, shows mitochondria are displaced and disorganized in DKO muscle. Bar=100 μm.

#### **Supplemental Figure 4**

Modified Gomori's trichrome stain of soleus (A, cross sections) and tibialis anterior (B, transverse sections) muscles of wild-type (WT), MuRF1<sup>-/-</sup>, MuRF3<sup>-/-</sup> and DKO mice. No ragged red fibers were observed in DKO muscle. Bar=100 μm.

#### **Supplemental Figure 5**

- a) *In vitro* ubiquitination assays were performed with recombinant E1 ubiquitin-activating enzyme, different E2 ubiquitin-conjugating enzymes (as indicated), MBP-MuRF1 (left panel) or MBP-MuRF3 (right panel), ubiquitin (Ub), ATP and GST-MHCIIa for 2 hours. Ub-protein conjugates were resolved by SDS-PAGE and detected by anti-Ub antibody. Ubiquitination activity, as assessed by the detection of high-molecular-weight multiubiquitin chains, was detected only in reactions containing E1, UbcH2, 5a, 5b, 5c, MBP-MuRF1 or MBP-MuRF3, Ub and GST-MHCIIa. No ubiquitination activity was detected when the E2 ubiquitin-conjugating enzymes UbcH3, 6, 7 and 10 were used.



b) *In vitro* ubiquitination assays were performed with recombinant E1 ubiquitin-activating enzyme, the E2 ubiquitin-conjugating enzymes Ubch5a, 5b and 5c, ubiquitin (Ub), ATP, GST-MHCIIa and MBP-MuRF1, MBP-MuRF3 or RING-finger deletion mutants MBP-MuRF1 $\Delta$ RF (left panel) and MBP-MuRF3 $\Delta$ RF (right panel), respectively, for 2 hours. Ub-protein conjugates were resolved by SDS-PAGE and detected by anti-Ub antibody. Ubiquitination activity of MuRF1 and MuRF3 towards GST-MHCIIa was totally abolished when the RING-finger domain of MuRF1 and MuRF3 were delete.
